# Supplementary material for: Discovery of DNA dyes Hoechst 34580 and 33342 as good candidates for inhibiting amyloid beta formation: in silico and in vitro study
Source: PubMed Central journal article supplement (PMC5021751; doi:10.1007/s10822-016-9932-1), 2016-08-10
Supplement: 10822_2016_9932_MOESM1_ESM.pdf [file 10822_2016_9932_MOESM1_ESM.pdf]

## **Discovery of DNA dyes Hoechst 34580 and 33342 as good candidates for inhibiting amyloid beta formation: *in silico* and *in vitro* study**

Nguyen Quoc Thai<sup>1,2,3</sup>, Ning-Hsuan Tseng<sup>4</sup>, Mui Thi Vu<sup>1</sup>, Tin Trung Nguyen<sup>1</sup>, Huynh Quang Linh<sup>2</sup>, Chin-Kun Hu<sup>5,6,7</sup> ‡, Yun-Ru Chen<sup>4,‡</sup>, and Mai Suan Li<sup>1,8,‡</sup>.

<sup>1</sup>Institute for Computational Science and Technology, SBI building, Quang Trung Software City, Tan Chanh Hiep Ward, District 12, Ho Chi Minh City, Vietnam

<sup>2</sup>Biomedical Engineering Department, University of Technology -VNU HCM, 268 Ly Thuong Kiet Str., Distr. 10, Ho Chi Minh City, Vietnam

<sup>3</sup>Division of Theoretical Physics, Dong Thap University, 783 Pham Huu Lau Street, Ward 6, Cao Lanh City, Dong Thap, Vietnam

<sup>4</sup>Genomics Research Center, Academia Sinica, Academia Rd., Sec. 2, Nankang Dist., Taipei 115, Taiwan

<sup>5</sup>Institute of Physics, Academia Sinica, 128 Academia Road Section 2, Taipei 11529, Taiwan

<sup>6</sup>National Center for Theoretical Sciences, National Tsing Hua University, 101 Kuang-Fu Road Section 2, Hsinch 30013, Taiwan.

<sup>7</sup>Business School, University of Shanghai for Science and Technology, 334 Jun Gong Road, Shanghai 200093, China

<sup>8</sup>Institute of Physics, Polish Academy of Sciences, Al. Lotnikow 32/46, 02-668 Warsaw, Poland

‡ Email: [masli@ifpan.edu.pl](mailto:masli@ifpan.edu.pl); [huck@phys.sinic.edu.tw](mailto:huck@phys.sinic.edu.tw); [yrchen@gate.sinica.edu.tw](mailto:yrchen@gate.sinica.edu.tw)

## SUPPORTING INFORMATION

**Table S1.** Names, types atoms, masses and charges of atoms used in the simulation of Hoechst 33342 by AMBER-f99SB-ILDN force field.

| Nr | Type | Atom | Charge    | Mass     |
|----|------|------|-----------|----------|
| 1  | h1   | H1   | 0.057031  | 1.00800  |
| 2  | c3   | C1   | -0.07282  | 12.0100  |
| 3  | h1   | H2   | 0.057031  | 1.00800  |
| 4  | h1   | H3   | 0.057031  | 1.00800  |
| 5  | n3   | N1   | -0.25248  | 14.0100  |
| 6  | c3   | C2   | -0.08494  | 12.0100  |
| 7  | h1   | H4   | 0.078889  | 1.00800  |
| 8  | h1   | H5   | 0.078889  | 1.00800  |
| 9  | c3   | C3   | -0.09717  | 12.0100  |
| 10 | h1   | H6   | 0.094148  | 1.00800  |
| 11 | h1   | H7   | 0.094148  | 1.00800  |
| 12 | nh   | N2   | -0.16525  | 14.0100  |
| 13 | c3   | C4   | -0.09717  | 12.0100  |
| 14 | h1   | H8   | 0.094148  | 1.00800  |
| 15 | h1   | H9   | 0.094148  | 1.00800  |
| 16 | c3   | C5   | -0.08494  | 12.0100  |
| 17 | h1   | H10  | 0.078889  | 1.00800  |
| 18 | h1   | H11  | 0.078889  | 1.00800  |
| 19 | ca   | C6   | 0.055009  | 12.01000 |
| 20 | ca   | C7   | -0.06567  | 12.0100  |
| 21 | ha   | H12  | 0.088317  | 1.00800  |
| 22 | ca   | C8   | -0.288207 | 12.0100  |
| 23 | ha   | H13  | 0.158276  | 1.00800  |
| 24 | ca   | C9   | 0.310627  | 12.01000 |
| 25 | ca   | C10  | -0.29439  | 12.0100  |
| 26 | ha   | H14  | 0.167321  | 1.00800  |
| 27 | ca   | C11  | 0.080638  | 12.01000 |
| 28 | na   | N3   | -0.345553 | 14.01000 |
| 29 | hn   | H15  | 0.306297  | 1.00800  |
| 30 | cc   | C12  | 0.355692  | 12.01000 |
| 31 | nd   | N4   | -0.521200 | 14.01000 |
| 32 | ca   | C13  | -0.04935  | 12.0100  |
| 33 | ca   | C14  | -0.06837  | 12.0100  |
| 34 | ha   | H16  | 0.101583  | 1.00800  |
| 35 | ca   | C15  | -0.29154  | 12.0100  |
| 36 | ha   | H17  | 0.147214  | 1.00800  |

|    |    |     |           |          |
|----|----|-----|-----------|----------|
| 37 | ca | C16 | 0.177816  | 12.01000 |
| 38 | ca | C17 | 0.225023  | 12.01000 |
| 39 | ca | C18 | -0.20618  | 12.0100  |
| 40 | ha | H18 | 0.141074  | 1.00800  |
| 41 | na | N5  | -0.437476 | 14.01000 |
| 42 | hn | H19 | 0.329237  | 1.00800  |
| 43 | cc | C19 | 0.423461  | 12.01000 |
| 44 | nd | N6  | -0.480673 | 14.01000 |
| 45 | ca | C20 | -0.12608  | 12.0100  |
| 46 | ca | C21 | -0.10764  | 12.0100  |
| 47 | ha | H20 | 0.109542  | 1.00800  |
| 48 | ca | C22 | -0.10764  | 12.0100  |
| 49 | ha | H21 | 0.109542  | 1.00800  |
| 50 | ca | C23 | -0.10173  | 12.0100  |
| 51 | ha | H22 | 0.098267  | 1.00800  |
| 52 | ca | C24 | 0.125718  | 12.01000 |
| 53 | os | O1  | -0.260954 | 16.00000 |
| 54 | c3 | C25 | 0.183995  | 12.01000 |
| 55 | h1 | H23 | 0.030340  | 1.00800  |
| 56 | h1 | H24 | 0.030340  | 1.00800  |
| 57 | ca | C26 | -0.10173  | 12.0100  |
| 58 | ha | H25 | 0.098267  | 1.00800  |
| 59 | c3 | C27 | -0.17173  | 12.0100  |
| 60 | hc | H26 | 0.054706  | 1.00800  |
| 61 | hc | H27 | 0.054706  | 1.00800  |
| 62 | hc | H28 | 0.054706  | 1.00800  |

**Table S2.** Names, types, masses and charges of atoms used in the simulation of Hoechst 34580 by AMBER-f99SB-ILDN force field.

| Nr | Type | Atom | Charge   | Mass    |
|----|------|------|----------|---------|
| 1  | h1   | H1   | 0.059036 | 1.00800 |
| 2  | c3   | C1   | -0.08420 | 12.0100 |
| 3  | h1   | H2   | 0.059036 | 1.00800 |
| 4  | h1   | H3   | 0.059036 | 1.00800 |
| 5  | n3   | N1   | -0.25914 | 14.0100 |
| 6  | c3   | C2   | -0.07245 | 12.0100 |
| 7  | h1   | H4   | 0.077638 | 1.00800 |
| 8  | h1   | H5   | 0.077638 | 1.00800 |
| 9  | c3   | C3   | -0.08691 | 12.0100 |
| 10 | h1   | H6   | 0.086434 | 1.00800 |

|    |    |     |           |          |
|----|----|-----|-----------|----------|
| 11 | h1 | H7  | 0.086434  | 1.00800  |
| 12 | nh | N2  | -0.15531  | 14.0100  |
| 13 | c3 | C4  | -0.08691  | 12.0100  |
| 14 | h1 | H8  | 0.086434  | 1.00800  |
| 15 | h1 | H9  | 0.086434  | 1.00800  |
| 16 | c3 | C5  | -0.07245  | 12.0100  |
| 17 | h1 | H10 | 0.077638  | 1.00800  |
| 18 | h1 | H11 | 0.077638  | 1.00800  |
| 19 | ca | C6  | 0.025912  | 12.01000 |
| 20 | ca | C7  | -0.13977  | 12.0100  |
| 21 | ha | H12 | 0.114647  | 1.00800  |
| 22 | ca | C8  | -0.215497 | 12.0100  |
| 23 | ha | H13 | 0.140130  | 1.00800  |
| 24 | ca | C9  | -0.166246 | 12.0100  |
| 25 | ha | H14 | 0.134020  | 1.00800  |
| 26 | ca | C10 | 0.270678  | 12.01000 |
| 27 | ca | C11 | 0.029060  | 12.01000 |
| 28 | na | N3  | -0.379194 | 14.01000 |
| 29 | hn | H15 | 0.315536  | 1.00800  |
| 30 | cc | C12 | 0.433418  | 12.01000 |
| 31 | nd | N4  | -0.538194 | 14.01000 |
| 32 | ca | C13 | -0.08226  | 12.0100  |
| 33 | ca | C14 | -0.06444  | 12.0100  |
| 34 | ha | H16 | 0.096937  | 1.00800  |
| 35 | ca | C15 | -0.33671  | 12.0100  |
| 36 | ha | H17 | 0.154683  | 1.00800  |
| 37 | ca | C16 | 0.258496  | 12.01000 |
| 38 | ca | C17 | 0.169677  | 12.01000 |
| 39 | ca | C18 | -0.18971  | 12.0100  |
| 40 | ha | H18 | 0.136896  | 1.00800  |
| 41 | na | N5  | -0.473661 | 14.01000 |
| 42 | hn | H19 | 0.332480  | 1.00800  |
| 43 | cc | C19 | 0.408914  | 12.01000 |
| 44 | nd | N6  | -0.455372 | 14.01000 |
| 45 | ca | C20 | -0.09921  | 12.0100  |
| 46 | ca | C21 | -0.10275  | 12.0100  |
| 47 | ha | H20 | 0.096433  | 1.00800  |
| 48 | ca | C22 | -0.12772  | 12.0100  |
| 49 | ha | H21 | 0.121090  | 1.00800  |
| 50 | ca | C23 | -0.10275  | 12.0100  |
| 51 | ha | H22 | 0.096433  | 1.00800  |
| 52 | ca | C24 | -0.12772  | 12.0100  |
| 53 | ha | H23 | 0.121090  | 1.00800  |

|    |    |     |           |          |
|----|----|-----|-----------|----------|
| 54 | ca | C25 | 0.000329  | 12.01000 |
| 55 | nh | N7  | -0.013424 | 14.01000 |
| 56 | c3 | C26 | -0.17966  | 12.0100  |
| 57 | h1 | H24 | 0.083524  | 1.00800  |
| 58 | h1 | H25 | 0.083524  | 1.00800  |
| 59 | h1 | H26 | 0.083524  | 1.00800  |
| 60 | c3 | C27 | -0.17966  | 12.0100  |
| 61 | h1 | H27 | 0.083524  | 1.00800  |
| 62 | h1 | H28 | 0.083524  | 1.00800  |
| 63 | h1 | H29 | 0.083524  | 1.00800  |

**Table S3.** Log(BB), binding energy  $E_{\text{bind}}$  and  $F_{\text{max}}$  obtained by the docking and SMD simulations for 13 top ligands bound to 2MXU. The first column shows the ranking by docking and SMD (in parentheses). The 3D structures of top hits are shown in the last column.

| Ranking by Dock(SMD) | CID                   | Docking Ebind (kcal/mol) | $F_{\text{max}}$ (pN) | log(BB) | Structure 3D                                                                          |
|----------------------|-----------------------|--------------------------|-----------------------|---------|---------------------------------------------------------------------------------------|
| 1(4)                 | 1464 (Hoechst 33342)  | -10.4                    | 458                   | 0.67    | 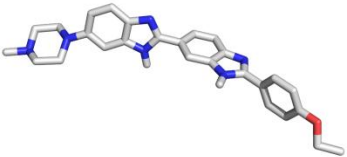  |
| 2(12)                | 5326397               | -10.4                    | 238                   | 0.21    |  |
| 3(5)                 | 444058                | -10.0                    | 449                   | 0.53    |  |
| 4(1)                 | 448202(Hoechst 34580) | -9.8                     | 498                   | 0.73    |  |
| 5(2)                 | 448201                | -9.8                     | 482                   | 0.84    |  |
| 6(3)                 | 442972                | -9.7                     | 473                   | 0.82    |  |

|        |          |      |        |      |                                                                                       |
|--------|----------|------|--------|------|---------------------------------------------------------------------------------------|
| 7(8)   | 447736   | -9.7 | 395.46 | 0.04 | 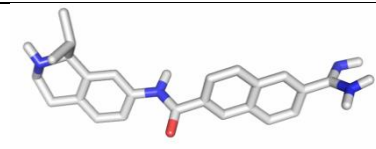   |
| 8(7)   | 11167118 | -9.7 | 402    | 0.39 |    |
| 9(11)  | 11690363 | -9.7 | 374    | 0.52 |    |
| 10(10) | 447735   | -9.6 | 377    | 0.10 |    |
| 11(9)  | 6540268  | -9.6 | 384    | 0.11 |    |
| 12(13) | 447767   | -9.3 | 157    | 0.89 |   |
| 13(6)  | 9956146  | -9.1 | 406    | 0.23 |  |

**Table S4:** Binding energy  $E_{\text{bind}}$ , obtained by docking,  $F_{\text{max}}$  and  $\log(\text{BB})$  of 15 top ligands revealed for receptor 2LMN by SMD simulation. The first column shows the ranking by docking and SMD (in parentheses). The 3D structures of top hits are shown in the last column.

| Ranking by Dock(SMD) | CID     | Docking $E_{\text{bind}}$ (kcal/mol) | $F_{\text{max}}$ (pN) | $\log(\text{BB})$ | 3D structure                                                                          |
|----------------------|---------|--------------------------------------|-----------------------|-------------------|---------------------------------------------------------------------------------------|
| 1 (7)                | 5327177 | -11.4                                | 619                   | 0.12              | 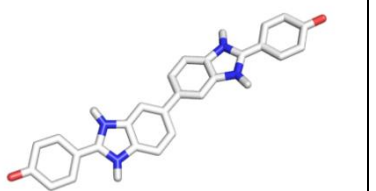 |

|        |                              |       |     |      |                                                                                       |
|--------|------------------------------|-------|-----|------|---------------------------------------------------------------------------------------|
| 2 (5)  | 448202<br>(Hoechst<br>34580) | -10.6 | 682 | 0.74 | 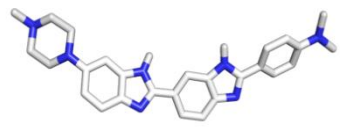   |
| 3 (9)  | 448201                       | -10.6 | 550 | 0.85 |    |
| 4 (2)  | 11545419                     | -10.4 | 695 | 0.84 |    |
| 5 (8)  | 4369491                      | -10.4 | 556 | 0.18 |    |
| 6 (3)  | 16062971                     | -10.3 | 692 | 0.09 |    |
| 7 (6)  | 1464<br>(Hoechst<br>33342)   | -10.3 | 664 | 0.67 |   |
| 8 (10) | 5327055                      | -10.3 | 536 | 0.16 |  |
| 9 (11) | 447767                       | -10.2 | 532 | 0.89 |  |

|         |          |        |        |      |                                                                                       |
|---------|----------|--------|--------|------|---------------------------------------------------------------------------------------|
| 10 (13) | 10297043 | -10.2  | 513    | 0.78 | 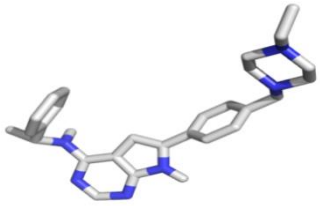   |
| 11 (14) | 444980   | -10.2  | 472    | 0.09 |    |
| 12 (1)  | 6083166  | -10.10 | 700.59 | 0.16 |    |
| 13 (12) | 2399     | -10.10 | 520.62 | 0.30 |    |
| 14 (4)  | 448793   | -10.00 | 684.98 | 0.12 |   |
| 15 (15) | 5330797  | -10.00 | 474.25 | 0.60 |  |

**Table S5.** Log(BB), binding energy  $E_{\text{bind}}$  and  $F_{\text{max}}$  obtained by the docking and SMD simulations for 11 top ligands bound to 2BEG. The first column shows the ranking by docking and SMD (in parentheses). The 3D structures of top hits are shown in the last column.

| Ranking by Dock(SMD) | CID      | Docking $E_{\text{bind}}$ (kcal/mol) | $F_{\text{max}}$ (pN) | log(BB) | Structure 3D                                                                          |
|----------------------|----------|--------------------------------------|-----------------------|---------|---------------------------------------------------------------------------------------|
| 1(4)                 | 16062971 | -8.7                                 | 311                   | 0.09    | 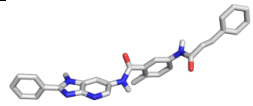 |



|        |                          |      |     |      |                                                                                       |
|--------|--------------------------|------|-----|------|---------------------------------------------------------------------------------------|
| 2(1)   | 11987705                 | -8.5 | 342 | 0.67 | 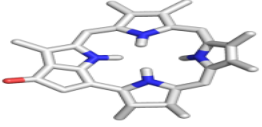   |
| 3(3)   | 5289319                  | -8.4 | 313 | 0    |    |
| 4(7)   | 1464 (Hoechst<br>33342)  | -8.3 | 265 | 0.67 |    |
| 5(9)   | 444980                   | -8.1 | 240 | 0.53 |    |
| 6(8)   | 5287621                  | -8.1 | 264 | 0.5  |    |
| 7(5)   | 9549303                  | -8.1 | 283 | 0.28 |    |
| 8(6)   | 447767                   | -8.0 | 275 | 0.89 |   |
| 9(10)  | 448202(Hoechst<br>34580) | -8.0 | 204 | 0.74 |  |
| 10(11) | 11494412                 | -8.0 | 172 | 0.4  |  |
| 11(2)  | 6083166                  | -8.0 | 339 | 0.16 |  |

**Table S6.** The contributions of individual blocks to the interaction energy of Hoechst 33342 (and Hoechst 34580) with fibril 2LMN for the AMBER-f99SB-ILDN force field. The numbers in parentheses refer to Hoechst 34580.

| Energy               | Block 1        | Block 2        | Block 3        | Block 4        | Block 5       |
|----------------------|----------------|----------------|----------------|----------------|---------------|
| $E_{vdw}$            | -14.27(-13.80) | -10.77(-15.34) | -14.04(-14.83) | -11.66(-11.15) | -7.89(-7.45)  |
| $E_{elec}$           | -2.91(-4.12)   | -2.11(-7.16)   | -4.81(0.90)    | -1.05(20.03)   | 2.78(-24.49)  |
| $E_{vdw} + E_{elec}$ | -17.18(-17.92) | -12.88(-22.50) | -18.85(-13.93) | -12.71(8.88)   | -5.11(-31.94) |

**Table S7.** The contribution of individual blocks to the interaction energy of Hoechst 33342 (and Hoechst 34580) with fibril 2M4J for the force field AMBER-f99SB-ILDN. The numbers in parentheses refer to Hoechst 34580.

| Energy               | Block 1        | Block 2        | Block 3       | Block 4      | Block 5      |
|----------------------|----------------|----------------|---------------|--------------|--------------|
| $E_{vdw}$            | -10.17(-9.08)  | -9.30(-11.04)  | -9.22(-11.2)  | -5.74(-6.07) | -2.34(-3.78) |
| $E_{elec}$           | -2.73 (-5.67)  | -5.77(-13.1)   | -7.28(10.01)  | 1.03(36.93)  | 7.03(-38.57) |
| $E_{vdw} + E_{elec}$ | -12.90(-14.75) | -15.07(-24.14) | -16.50(-1.19) | -4.77(30.85) | 5.37(-42.34) |

**Table S8.** The contribution of individual blocks to the interaction energy of Hoechst 33342 (and Hoechst 34580) with fibril 2BEG for the force field AMBER-f99SB-ILDN. The numbers in parentheses are for Hoechst 34580.

| Energy               | Block 1        | Block 2        | Block 3        | Block 4      | Block 5       |
|----------------------|----------------|----------------|----------------|--------------|---------------|
| $E_{vdw}$            | -15.17(-12.27) | -14.77(-12.84) | -12.25(-14.65) | -6.18(-7.89) | -2.95(-3.66)  |
| $E_{elec}$           | -0.92(-2.99)   | -8.44(-1.68)   | -3.73(1.81)    | 0.03(9.01)   | 2.2(-10.46)   |
| $E_{vdw} + E_{elec}$ | -16.01(-15.26) | -23.21(-14.52) | -15.98(-12.84) | -6.15(1.12)  | -0.76(-14.12) |

**Table S9.** The contribution of individual blocks to the interaction energy of Hoechst 33342 (and Hoechst 34580) with fibril 2MXU for the force field AMBER-f99SB-ILDN. The numbers in parentheses are for Hoechst 34580.

| Energy                             | Block 1        | Block 2        | Block 3        | Block 4        | Block 5        |
|------------------------------------|----------------|----------------|----------------|----------------|----------------|
| $E_{\text{vdw}}$                   | -11.60(-14.94) | -13.06(-16.27) | -13.52(-17.27) | -10.20(-10.42) | -4.37 (-6.41)  |
| $E_{\text{elec}}$                  | -0.74(-1.59)   | -0.90(-0.85)   | -2.47(-0.98)   | -0.74(4.17)    | 0.39(-5.42)    |
| $E_{\text{vdw}} + E_{\text{elec}}$ | -12.34(-16.53) | -13.96(-17.12) | -15.99(-18.26) | -10.94(-6.25)  | -3.98 (-11.83) |

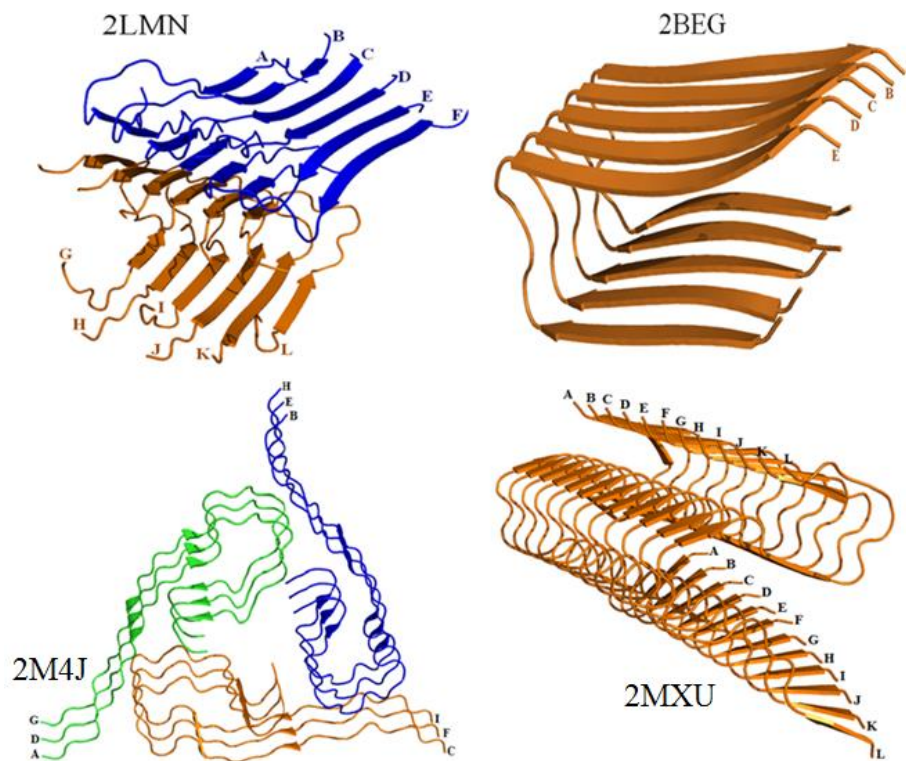

Figure S1. The PDB structure of A $\beta$ 40 fibrils (PDB ID: 2LMN and 2M4J) and A $\beta$ 42 fibrils (PDB ID 2BEG and 2MXU). Capital letters refer to polypeptide chains.

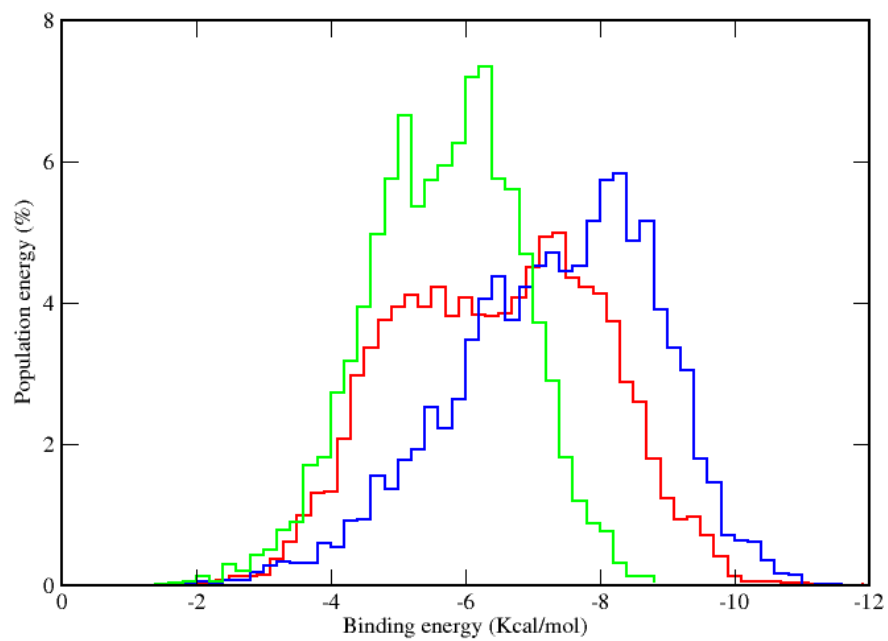

Figure S2. Population of binding energies of 5372 ligands to 2LMN (blue), 2MXU (red) and 2BEG (green). Results were obtained in the best docking mode.

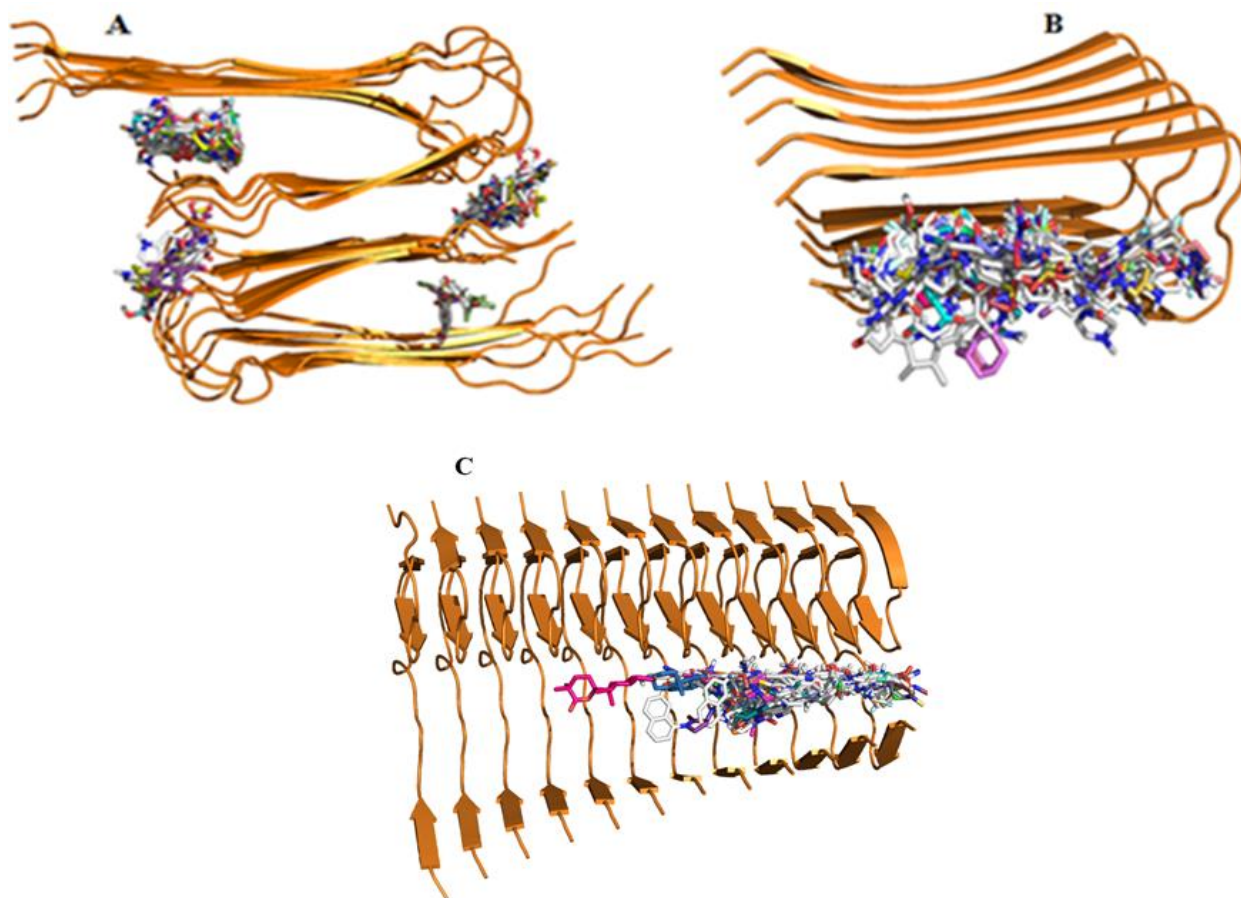

Figure S3. Binding positions of 96 compounds with the binding energy lower than -10 kcal/mol for 2LMN (A), 55 compounds with  $\Delta E_{\text{bind}} < -8.0$  kcal/mol for 2BEG (B), and 57 compounds with  $\Delta E_{\text{bind}} < -9.0$  kcal/mol for 2MXU (C). The structures were obtained in the best docking mode.

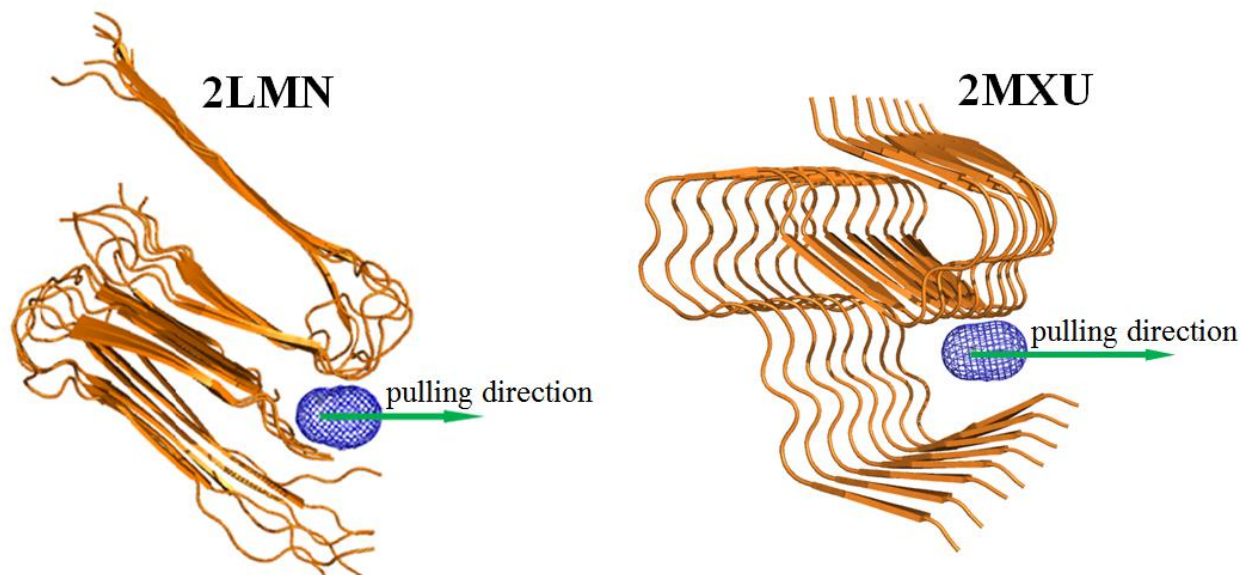

Figure S4. Optimal pulling directions revealed by the Caver 3.0 software for Hoechst 33342 and Hoechst 33342 to escape from 2LMN (left) and from 2MXU (right).

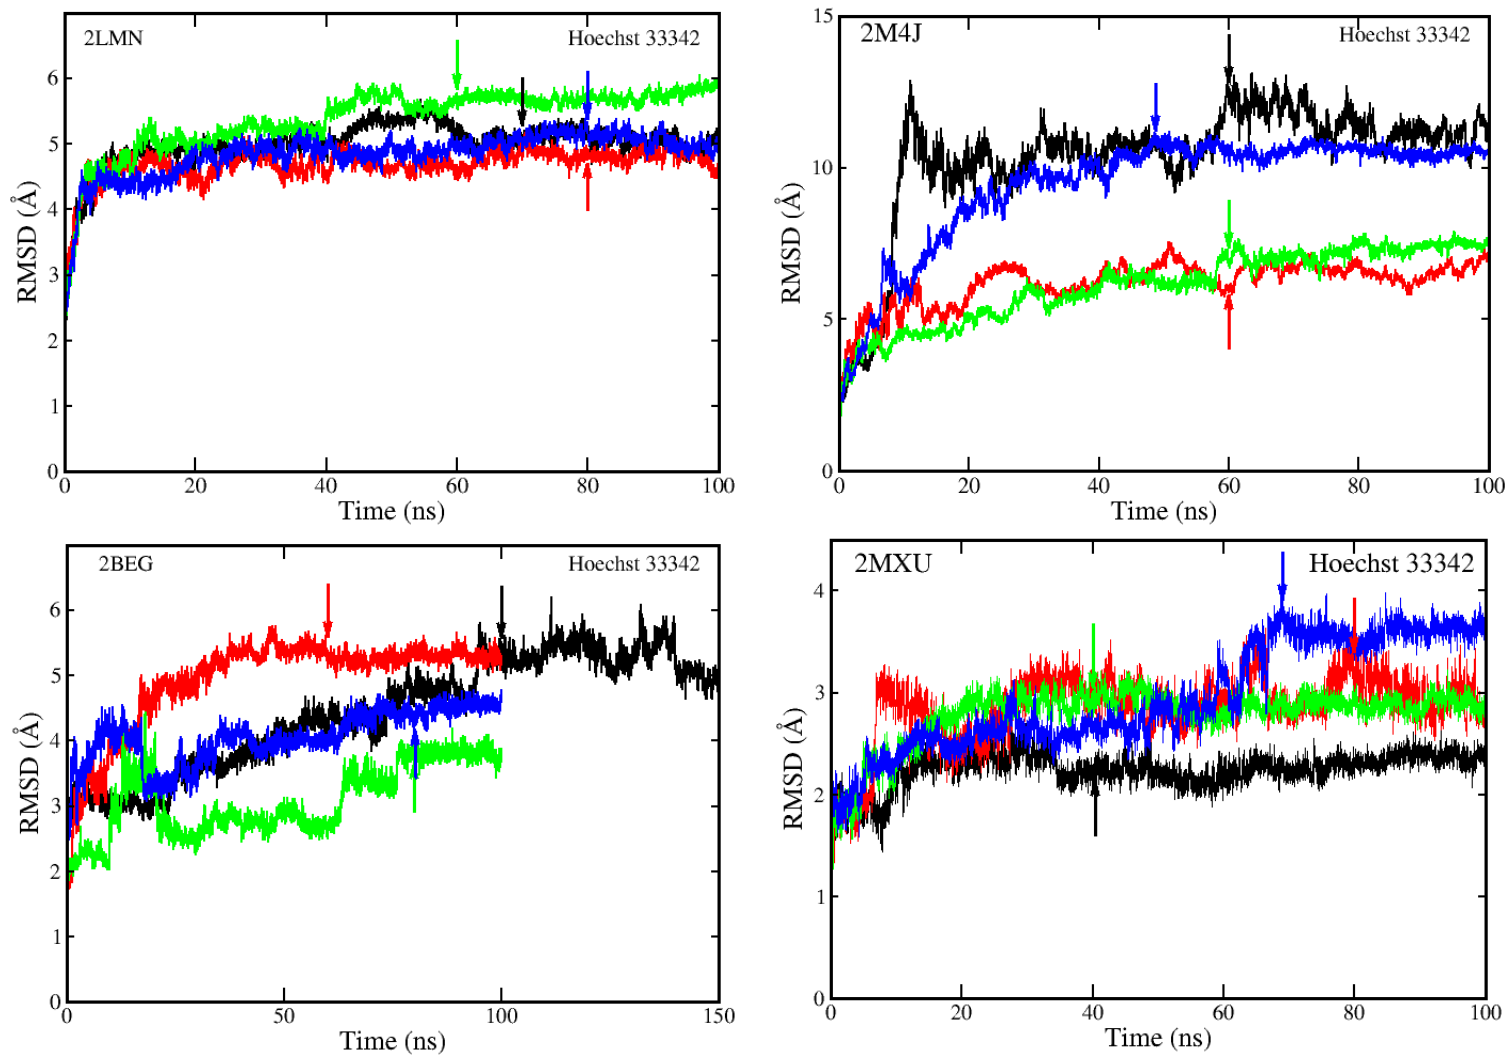

Figure S5. Time dependence of RMSD with respect to the initial structure for 2LMN, 2M4J, 2BEG and 2MXU in complex with Hoechst 33342 with the force field AMBER-f99SB-ILDN. Arrows refer to time when the systems reach equilibrium.



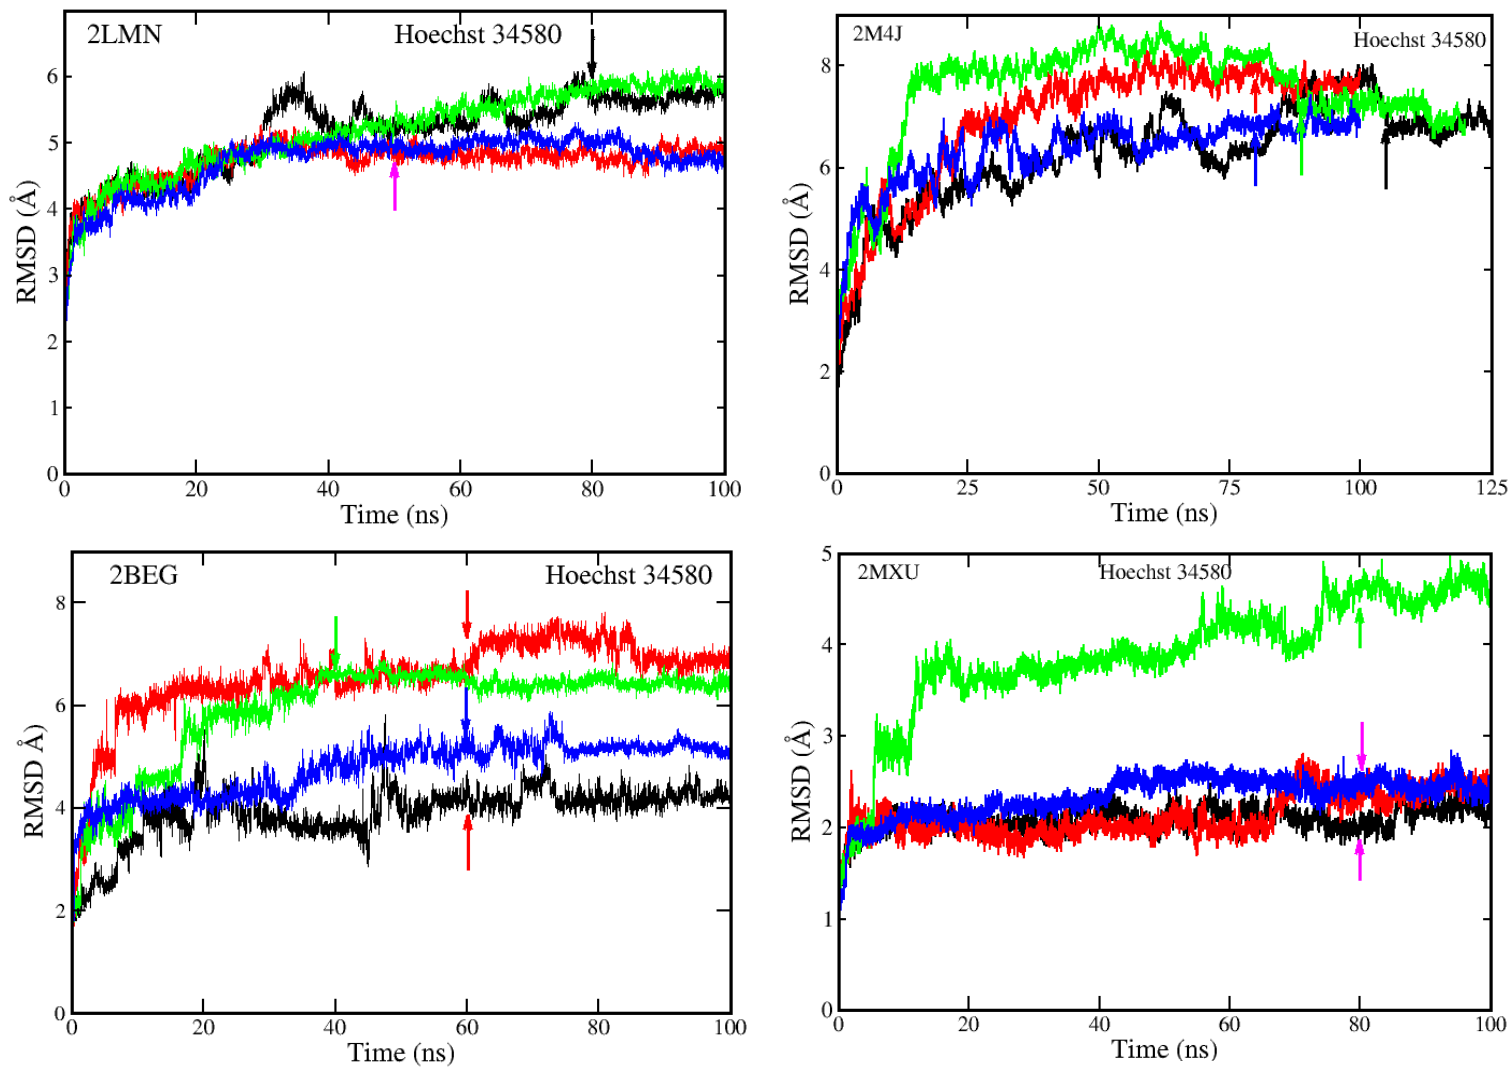

Figure S6. Time dependence of RMSD with respect to the initial structure for 2LMN, 2M4J, 2BEG and 2MXU in complex with Hoechst 34580 with the force field AMBER-f99SB-ILDN. Arrows refer to time when the systems reach equilibrium.

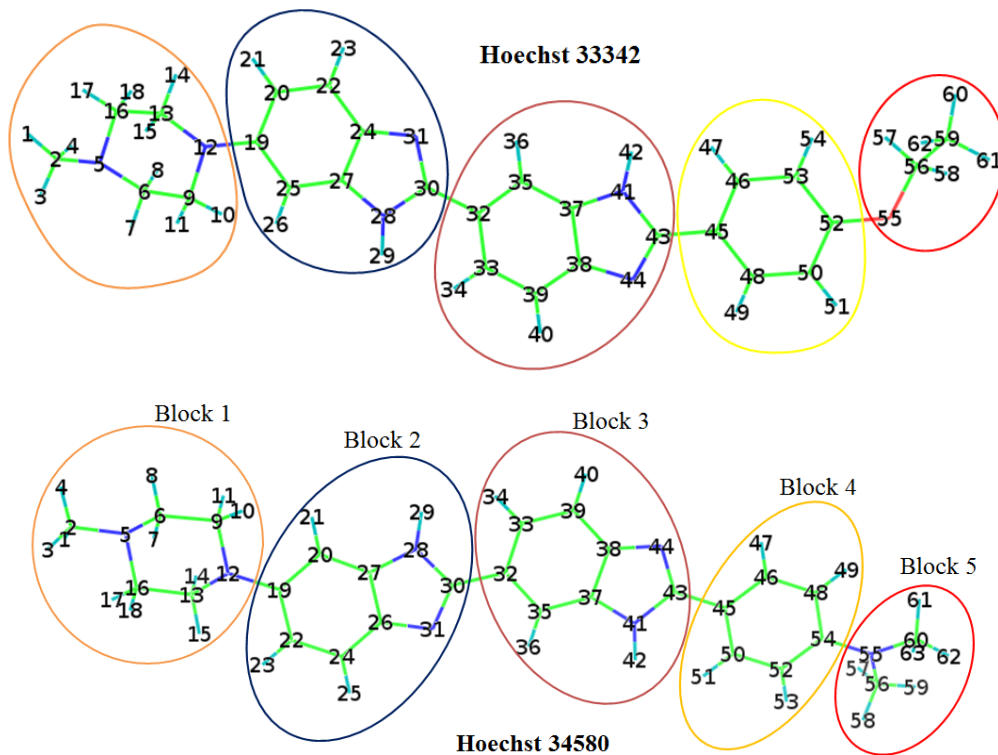

Figure S7. The structure of Hoechst 34580 and Hoechst 33342 divided into 5 blocks. Atom numbers were generated by the Gromacs software where the united atom approximation (aliphatic ( $\text{CH}_n$ ) and aromatic hydrogen atoms are implicitly included by describing the C atom and attached H atoms as a single group centered on the C atom) was used.

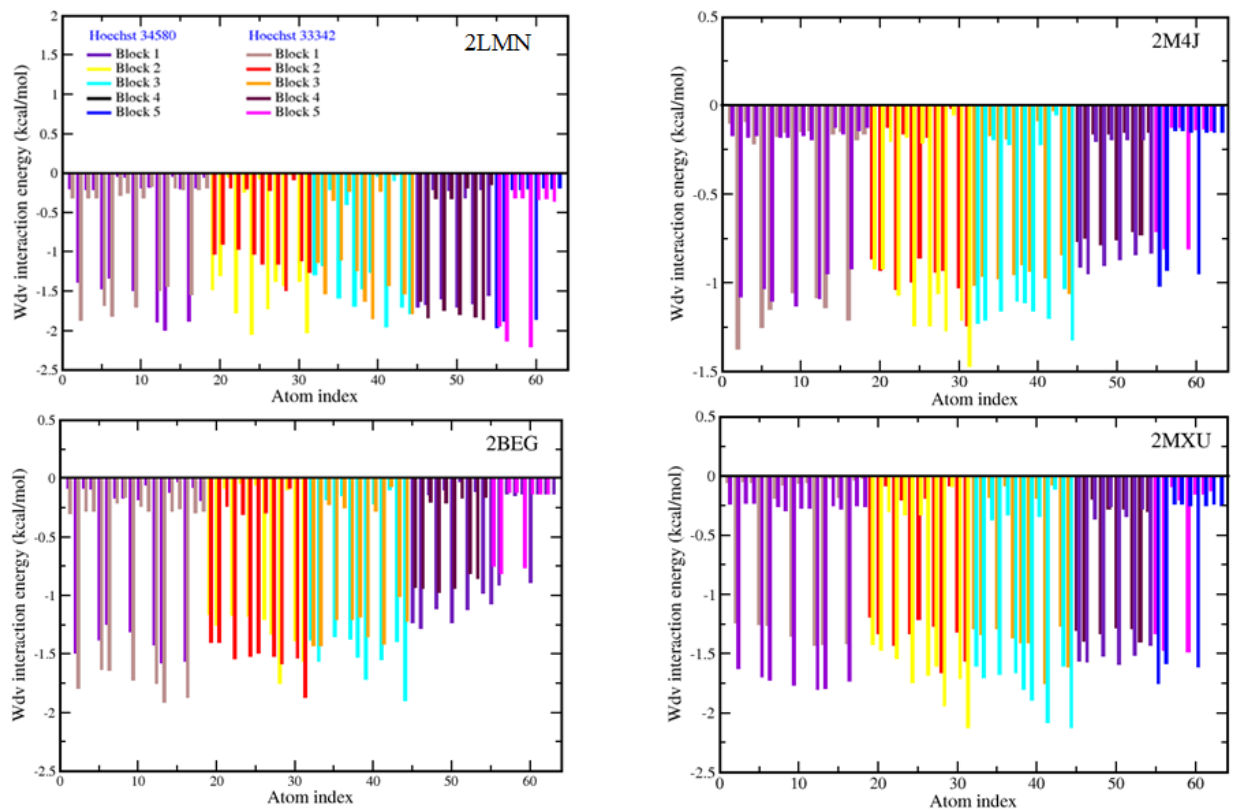

Figure S8. Per-atom contributions of DNA dyes to the vdW interaction energy with four receptors (2LMN, 2M4J, 2BEG, and 2MXU). Different colors are used to distinguish blocks of two DNA dyes.

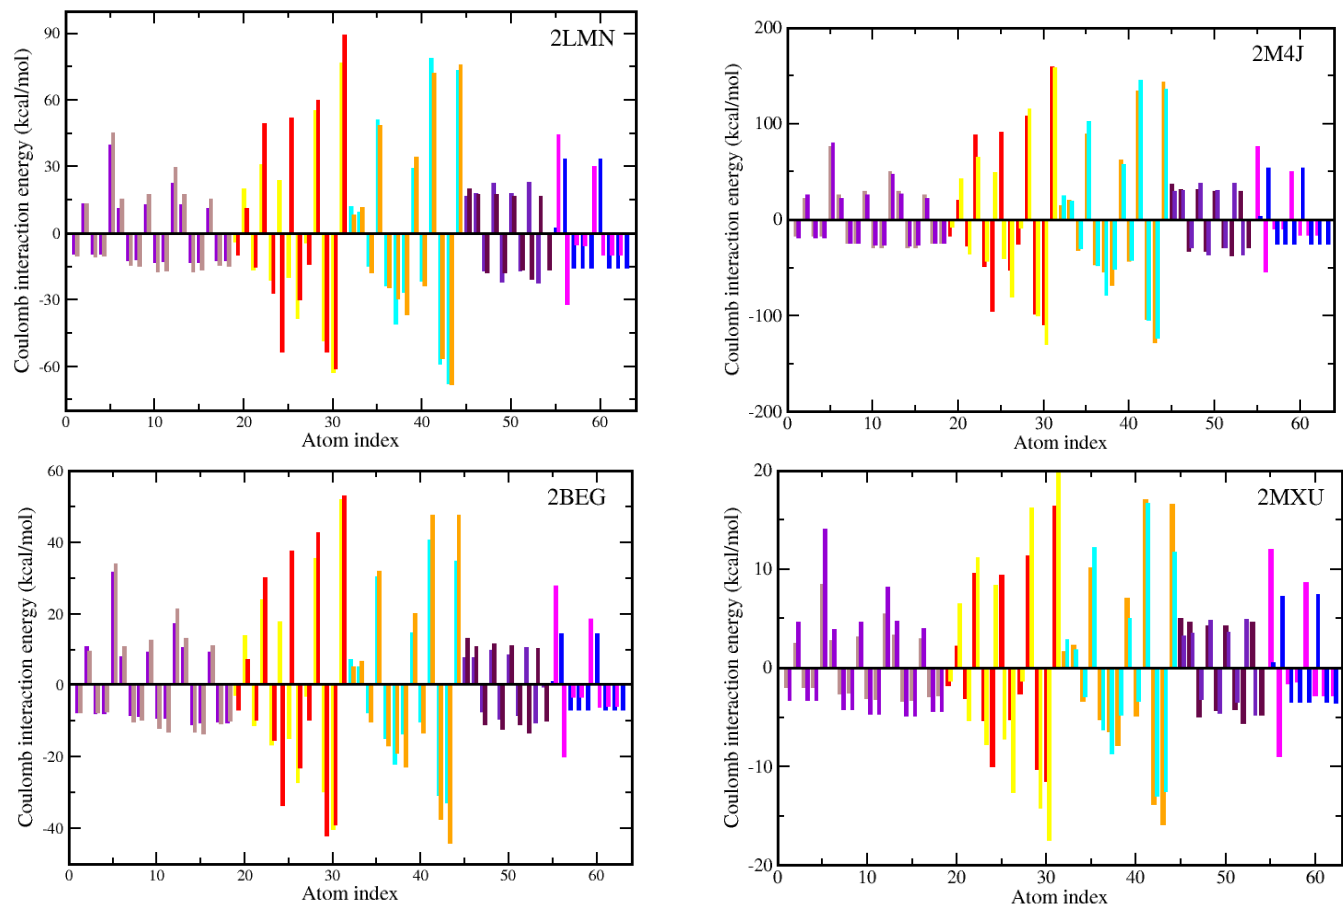

Figure S9. Per-atom contribution of ligands to the electrostatic interaction energy with four receptors (2LMN, 2M4J, 2BEG, and 2MXU). Different colors are used to distinguish blocks of two ligands (see Figure S7).

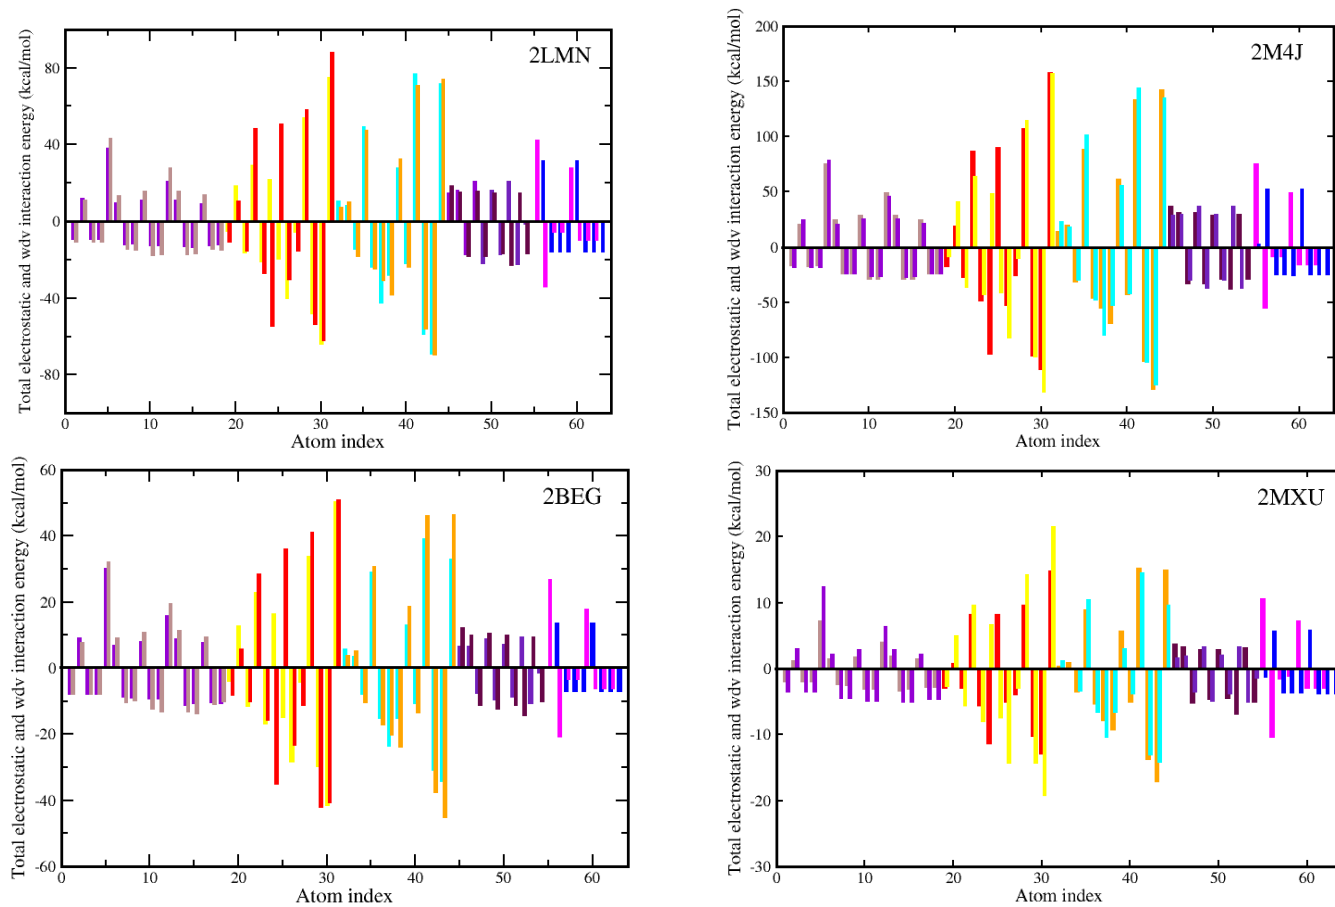

Figure S10. Per-atom total electrostatic and vdW interaction energy. Different colors are used to distinguish blocks (see Figure S7).
